# Supplementary material
Source: PubMed Central journal article supplement (PMC4640288)
Supplement: etj-0004-0119-s03.pdf [file etj-0004-0119-s03.pdf]

A

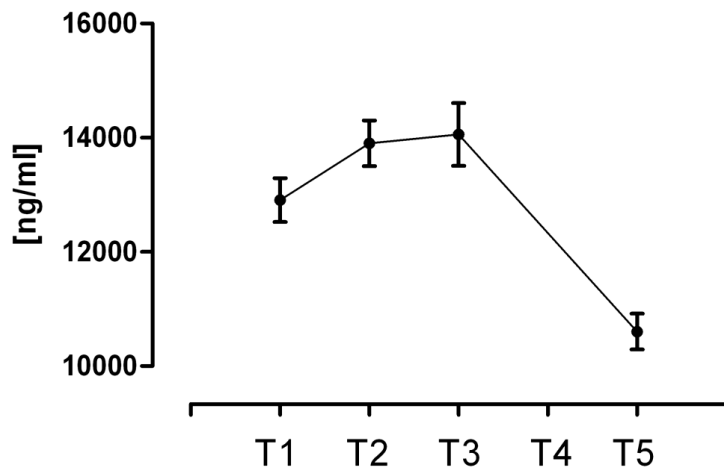

B

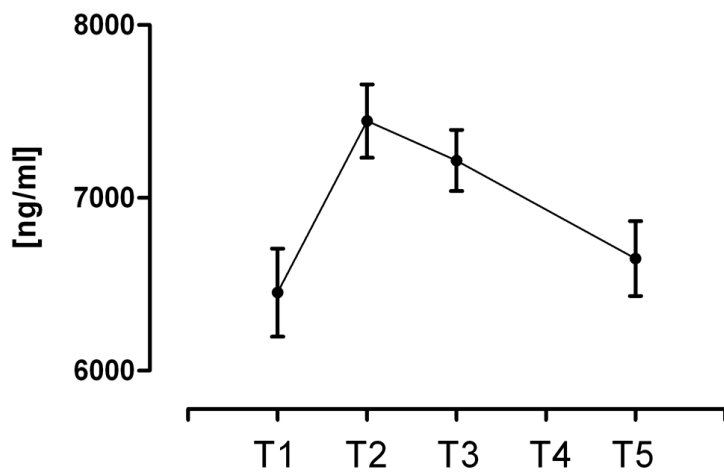

**Supplemental figure S1: Results of enzyme linked immunosorbent assay for factor XIII (A) and factor IX (B). Data displayed as mean  $\pm$  SEM.**
