# Supplementary material
Source: PubMed Central journal article supplement (PMC4640288)
Supplement: etj-0004-0119-s04.pdf [file etj-0004-0119-s04.pdf]

**Supplemental Table 1. Proteins assigned to the category *Coagulation cascade***

| Gene Symbol | Entrez Gene Name                                                                                       | UniProt/Swiss-Prot Accession | correlation |          |
|-------------|--------------------------------------------------------------------------------------------------------|------------------------------|-------------|----------|
|             |                                                                                                        |                              | coefficient | p-value  |
| PLG         | plasminogen                                                                                            | PLMN_HUMAN                   | -0.976      | 4.44E-03 |
| F7          | coagulation factor VII (serum prothrombin conversion accelerator)                                      | FA7_HUMAN                    | -0.731      | 1.61E-01 |
| PROC        | protein C (inactivator of coagulation factors Va and VIIIa)                                            | PROC_HUMAN                   | -0.519      | 3.70E-01 |
| KLKB1       | kallikrein B, plasma (Fletcher factor) 1                                                               | KLKB1_HUMAN                  | -0.367      | 5.43E-01 |
| VWF         | von Willebrand factor                                                                                  | VWF_HUMAN                    | -0.177      | 7.76E-01 |
| FGG         | fibrinogen gamma chain                                                                                 | FIBG_HUMAN                   | -0.018      | 9.77E-01 |
| F12         | coagulation factor XII (Hageman factor)                                                                | FA12_HUMAN                   | -0.006      | 9.93E-01 |
| FGA         | fibrinogen alpha chain                                                                                 | FIBA_HUMAN                   | 0.106       | 8.66E-01 |
| FGB         | fibrinogen beta chain                                                                                  | FIBB_HUMAN                   | 0.2         | 7.47E-01 |
| A2M         | alpha-2-macroglobulin                                                                                  | A2MG_HUMAN                   | 0.31        | 6.12E-01 |
| SERPINA1    | serpin peptidase inhibitor, clade A (alpha-1 antiproteinase, antitrypsin), member 1                    | A1AT_HUMAN                   | 0.373       | 5.36E-01 |
| PROS1       | protein S (alpha)                                                                                      | PROS_HUMAN                   | 0.465       | 4.30E-01 |
| SERPIND1    | serpin peptidase inhibitor, clade D (heparin cofactor), member 1                                       | HEP2_HUMAN                   | 0.466       | 4.29E-01 |
| F13A1       | coagulation factor XIII, A1 polypeptide                                                                | F13A_HUMAN                   | 0.725       | 1.66E-01 |
| F10         | coagulation factor X                                                                                   | FA10_HUMAN                   | 0.73        | 1.62E-01 |
| F11         | coagulation factor XI                                                                                  | FA11_HUMAN                   | 0.811       | 9.59E-02 |
| F2          | coagulation factor II (thrombin)                                                                       | THRB_HUMAN                   | 0.813       | 9.44E-02 |
| F5          | coagulation factor V (proaccelerin, labile factor)                                                     | FA5_HUMAN                    | 0.816       | 9.19E-02 |
| SERPINF2    | serpin peptidase inhibitor, clade F (alpha-2 antiplasmin, pigment epithelium derived factor), member 2 | A2AP_HUMAN                   | 0.903       | 3.57E-02 |
| SERPINC1    | serpin peptidase inhibitor, clade C (antithrombin), member 1                                           | ANT3_HUMAN                   | 0.933       | 2.05E-02 |
| F9          | coagulation factor IX                                                                                  | FA9_HUMAN                    | 0.938       | 1.82E-02 |
| KNG1        | kininogen 1                                                                                            | KNG1_HUMAN                   | 0.941       | 1.71E-02 |
| SERPINA5    | serpin peptidase inhibitor, clade A (alpha-1 antiproteinase, antitrypsin), member 5                    | IPSP_HUMAN                   | 0.969       | 6.51E-03 |
| F13B        | coagulation factor XIII, B polypeptide                                                                 | F13B_HUMAN                   | 0.991       | 1.02E-03 |

no correlation with FT4 ( $0.8 \geq r \geq -0.9$ )

correlation with FT4 ( $r \geq 0.8$ )

correlation with FT4 ( $r \geq 0.9$ )

correlation with FT4 ( $r \leq -0.9$ )
